# Supplementary material
Source: MDPI journal article supplement (https://www.mdpi.com/2077-1312/10/5/611)
Supplement: s1 [file s1]

T1: Uncaged

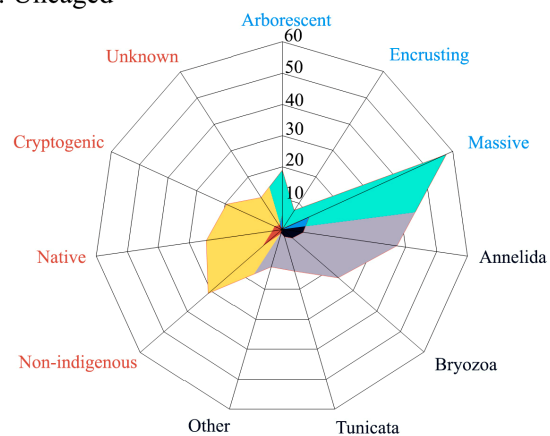

T2: Caged 15 mm mesh

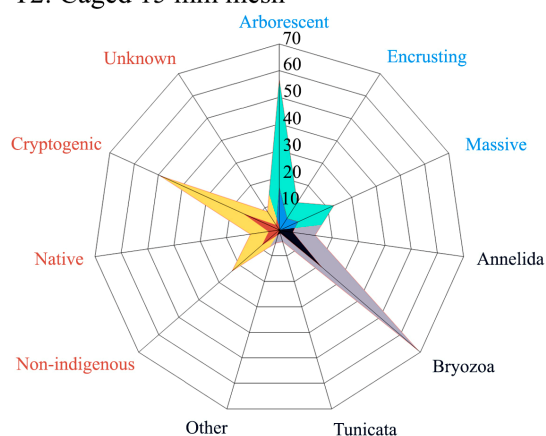

T3: Caged 1 mm mesh

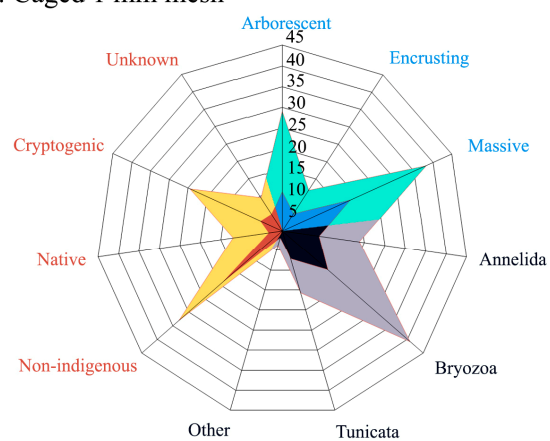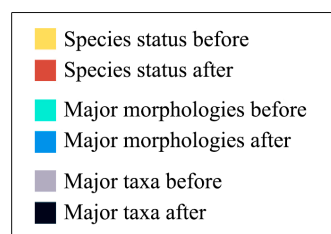

Figure S1

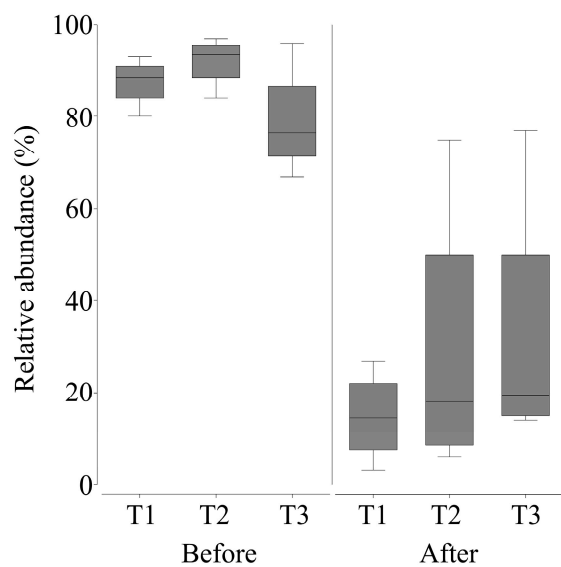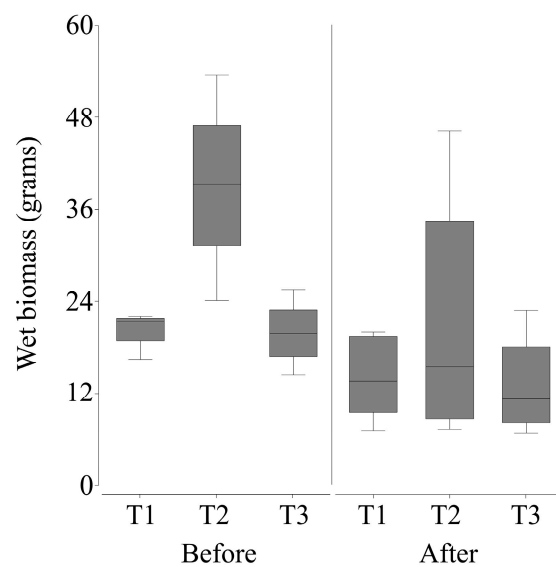

Figure S2

**Table S1:** Fish species sighted inside the marina of Quinta do Lorde

| <b>Families</b> | <b>Labridae</b>                            | <b>Pomacentridae</b>                                       | <b>Scaridae</b>                               |
|-----------------|--------------------------------------------|------------------------------------------------------------|-----------------------------------------------|
| Species         | <i>Thalassoma pavo</i><br>(Linnaeus, 1758) | <i>Abudefduf luridus</i><br>(Cuvier, 1830)                 | <i>Sparisoma cretense</i><br>(Linnaeus, 1758) |
| <b>Families</b> | <b>Sparidae</b>                            |                                                            |                                               |
| Species         | <i>Diplodus sargus</i><br>(Linnaeus, 1758) | <i>Diplodus vulgaris</i><br>(Geoffroy Saint-Hilaire, 1817) | <i>Oblada melanura</i><br>(Linnaeus, 1758)    |
|                 | <i>Pagellus acarne</i><br>(Risso, 1827)    | <i>Sarpa salpa</i><br>(Linnaeus, 1758)                     | <i>Sparus aurata</i><br>Linnaeus, 1758        |
| <b>Families</b> | <b>Synodontidae</b>                        | <b>Tetraodontidae</b>                                      |                                               |
| Species         | <i>Synodus saurus</i><br>(Linnaeus, 1758)  | <i>Canthigaster capistrata</i><br>(Lowe, 1839)             | <i>Sphoeroides marmoratus</i><br>(Lowe, 1838) |

**Table S2.** Fouling taxa and their mean percent coverage on each treatment before and after being exposed to foraging during the Remote Video Foraging System (RVFS) trials, including the references used for their identification and previous records for the archipelago of Madeira. Species status was assigned using the most updated [52]. C = Cryptogenic species; N = Native species; NIS = Non-indigenous species; U = Unresolved taxa; T1 = Treatment 1 (uncaged); T2 = Treatment 2 (caged with 15mm mesh); T3 = Treatment 3 (caged with 1mm mesh); Bef = Before predation; Aft = After predation.

| Taxa                                                                   | Status | References    | Before RVFT |      |      | After RVFT |      |      |
|------------------------------------------------------------------------|--------|---------------|-------------|------|------|------------|------|------|
|                                                                        |        |               | T1          | T2   | T3   | T1         | T2   | T3   |
| Amphipoda (1)                                                          |        |               | 4.5         | 0.3  | 0    | 0          | 0.3  | 0    |
| <i>Ericthonius punctatus</i> (Spence Bate, 1857)                       | C      | [61]          | 4.5         | 0.3  | 0    | 0          | 0.3  | 0    |
| Annelida (3)                                                           |        |               | 37.3        | 13.5 | 18.8 | 6.8        | 5    | 9    |
| <i>Salmacina dysteri</i> (Huxley, 1855)                                | N      | [60,44,62]    | 7           | 1    | 0    | 0.5        | 0.8  | 0    |
| <i>Spirobranchus triqueter</i> (Linnaeus, 1758)                        | N      | [55,62]       | 13.3        | 9    | 10   | 1.5        | 3    | 2    |
| <i>Spirorbis (Spirorbis) marioni</i> (Caullery & Mesnil, 1897)         | NIS    | [56]          | 17          | 2.5  | 8.8  | 4.8        | 1.8  | 7    |
| Bryozoa (6)                                                            |        |               | 23.8        | 69   | 40.8 | 4.3        | 21.3 | 14.5 |
| <i>Bugula neritina</i> (Linnaeus, 1758)                                | NIS    | [59,62,64]    | 2.5         | 0    | 0    | 0.8        | 0    | 0    |
| <i>Bugulina simplex</i> (Hincks, 1886)                                 | NIS    | [62,64]       | 0           | 0    | 0.3  | 0          | 0    | 0.3  |
| <i>Cradoscrupocellaria bertholletii</i> (Audouin, 1826)                | C      | [59,44,55,64] | 6.5         | 48.8 | 19.5 | 1.8        | 14   | 4.8  |
| <i>Crisia</i> sp.                                                      | U      |               | 8           | 8    | 9.3  | 1.3        | 2    | 4.5  |
| <i>Parasmittina alba</i> Ramalho, Muricy & Taylor, 2011                | NIS    | [65,64]       | 6.5         | 12.3 | 11.8 | 0.3        | 5.3  | 5    |
| <i>Virididentula dentata</i> (Lamouroux, 1816)                         | C      | [59,44,62,64] | 0.3         | 0    | 0    | 0.3        | 0    | 0    |
| Macroalgae (3)                                                         |        |               | 2.8         | 0.3  | 0    | 1          | 0    | 0    |
| <i>Lithophyllum incrustans</i> Philippi, 1837                          | N      | [57,44,62]    | 0.8         | 0.3  | 0    | 0.3        | 0    | 0    |
| <i>Neosiphonia sertularioides</i> (Grateloup) K.W.Nam & P.J.Kang, 2012 | N      | [58,44,62]    | 1.8         | 0    | 0    | 0.5        | 0    | 0    |
| <i>Valonia utricularis</i> (Roth) C.Agardh, 1823                       | N      | [57,44,62]    | 0.3         | 0    | 0    | 0.3        | 0    | 0    |
| Porifera (4)                                                           |        |               | 1.8         | 4.3  | 3.8  | 0          | 1.3  | 1.8  |
| <i>Mycale (Carmia) senegalensis</i> Lévi, 1952                         | NIS    | [44,62]       | 0           | 0    | 0.3  | 0          | 0    | 0.3  |
| <i>Paraleucilla magna</i> Klautau, Monteiro & Borojevic, 2004          | NIS    | [44,55,64]    | 0           | 3.5  | 1.5  | 0          | 1    | 0.3  |
| Unknown sp.                                                            | U      |               | 0.3         | 0    | 0    | 0          | 0    | 0    |
| <i>Sycon ciliatum</i> (Fabricius, 1780)                                | N      | [54,44,62]    | 1.5         | 0.8  | 2    | 0          | 0.3  | 1.3  |
| Tunicata (9)                                                           |        |               | 17.5        | 4.8  | 15.8 | 2.8        | 1.5  | 7.3  |

|                                                       |     |                 |     |     |     |     |     |     |
|-------------------------------------------------------|-----|-----------------|-----|-----|-----|-----|-----|-----|
| <i>Botrylloides niger</i><br>Herdman, 1886            | NIS | [55,62,63]      | 2.8 | 0.8 | 9   | 0   | 0   | 4.5 |
| <i>Botryllus schlosseri</i> (Pallas,<br>1766)         | C   | [51, 55, 62,63] | 0.5 | 0   | 0.3 | 0   | 0   | 0   |
| <i>Clavelina lepadiformis</i><br>(Müller, 1776)       | NIS | [66, 53,62,63]  | 0   | 0   | 0.8 | 0   | 0   | 0.8 |
| <i>Distaplia corolla</i> Monniot<br>F., 1974          | NIS | [67,44,62,63]   | 2.5 | 3.5 | 0.8 | 2   | 1   | 0.8 |
| <i>Diplosoma listerianum</i><br>(Milne Edwards, 1841) | C   | [55, 62,63]     | 5.8 | 0   | 0   | 0.3 | 0   | 0   |
| <i>Perophora listeri</i><br>Wiegman, 1835             | C   | [62,63]         | 1   | 0.3 | 0.5 | 0.3 | 0.3 | 0.5 |
| <i>Symplegma brakenhielmi</i><br>(Michaelsen, 1904)   | C   | [55,56]         | 0   | 0   | 4.3 | 0   | 0   | 0.5 |
| <i>Trididemnum cereum</i><br>(Giard, 1872)            | C   | [44,62 ,63]     | 1   | 0   | 0   | 0   | 0   | 0   |
| Unknown sp.                                           | U   |                 | 4   | 0.3 | 0.3 | 0.3 | 0.3 | 0.3 |

**Table S3.** PERMANOVA results on the relative abundance of NIS and native species among treatments before and after Remote Video Foraging System (RVFS) trials. Tr = Treatment, 3 levels: uncaged (T1), caged 15mm (T2) and caged 1mm (T3); Ti = Time, 2 levels: before and after Remote Video Foraging System RVFS trials.

| Source    | df | Non-indigenous species (NIS) |                |         | Native species |                        |         |
|-----------|----|------------------------------|----------------|---------|----------------|------------------------|---------|
|           |    | MS                           | Pseudo-F       | P(perm) | MS             | Pseudo-F               | P(perm) |
| Treatment | 2  | 200.54                       | 1.4878         | 0.2474  | 102.13         | 4.5083                 | 0.0299* |
| Time      | 1  | 1855                         | 13.762         | 0.0011* | 925.04         | 40.836                 | 0.0001* |
| Tr × Ti   | 2  | 52.80                        | 0.3917         | 0.6883  | 125.29         | 5.531                  | 0.0145* |
| Residuals | 18 | 134.79                       |                |         | 22.653         |                        |         |
| Pair-wise |    |                              | Before > After |         |                | Before: T1 > (T2 = T3) |         |
|           |    |                              |                |         |                | After: T1 = T2 = T3    |         |

\* Statistically significant result.
